# Supplementary material
Source: PubMed Central journal article supplement (PMC4337662)

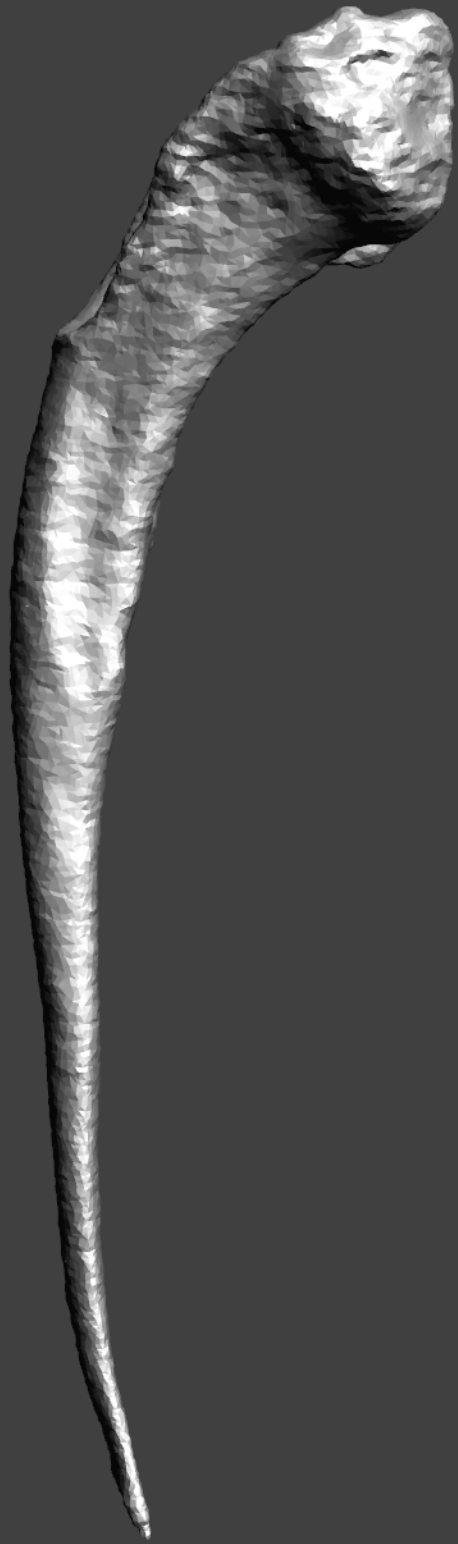

Supplement: joa0226-0229-sd8.pdf [file joa0226-0229-sd8.pdf]
